# Supplementary material for: Optical and electronic anisotropies in perovskitoid crystals of Cs3Bi2I9 studies of nuclear radiation detection
Source: Royal Society of Chemistry journal article supplement (doi:10.1039/c8ta09525f), 2018-01-01
Supplement: c8ta09525f1.pdf [file c8ta09525f1.pdf]

## Supporting Information

### **Optical and electronic anisotropies in perovskitoid crystals of Cs<sub>3</sub>Bi<sub>2</sub>I<sub>9</sub> studies of nuclear radiation detection**

Qihao Sun,<sup>a,b</sup> Yadong Xu,<sup>\*a,b,c</sup> Hongjian Zhang,<sup>b</sup> Bao Xiao,<sup>b</sup> Xin Liu,<sup>b</sup> Jiangpeng Dong,<sup>b</sup> Yuanbo Cheng,<sup>b</sup> Binbin Zhang,<sup>a,b</sup> Wanqi Jie,<sup>a,b</sup> and Mercouri. G. Kanatzidis<sup>\*c,d</sup>

<sup>a</sup>State Key Laboratory of Solidification Processing and <sup>b</sup>Key Laboratory of Radiation Detection Materials and Devices, Northwestern Polytechnical University, Xi'an 710072, China, <sup>c</sup>Department of Chemistry, Northwestern University, Evanston, IL 60208, USA <sup>d</sup>Materials Science Division, Argonne National Laboratory, Argonne, IL 60439, USA

#### **Corresponding Author:**

\* [Tel:+86-29-88460445](tel:+86-29-88460445);

e-mail address:

xyd220@nwpu.edu.cn (Y. Xu).

m-kanatzidis@northwestern.edu

## EDS Measurements

Table. S11 EDS analysis of  $\text{Cs}_3\text{Bi}_2\text{I}_9$ .

| Element | Theoretical atomic percentage (%) | The actual atomic percentage (%) |
|---------|-----------------------------------|----------------------------------|
| I       | 64.29                             | 64.88                            |
| Cs      | 21.43                             | 20.14                            |
| Bi      | 14.28                             | 14.98                            |
| Total:  | 100.00                            | 100.00                           |

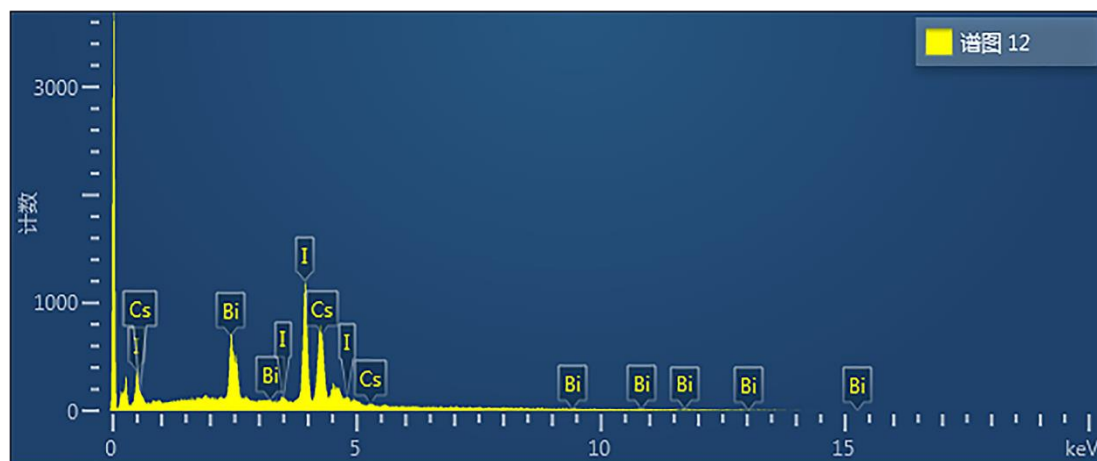

Fig. S11 The test spectrum results of EDS of  $\text{Cs}_3\text{Bi}_2\text{I}_9$ .

## Electric Measurements

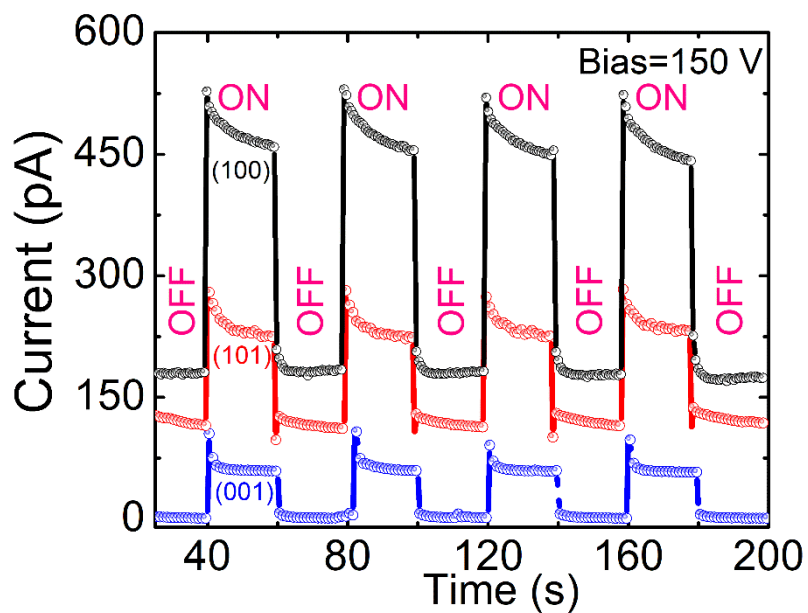

Fig. S12 Typical photoresponse contrast of  $\text{CBI}_{(100)}$ ,  $\text{CBI}_{(101)}$  and  $\text{CBI}_{(001)}$  at 150 V in 425nm LED ( $\sim 200 \text{ mW} \cdot \text{cm}^{-2}$ ).

## Radiation detection Characterization

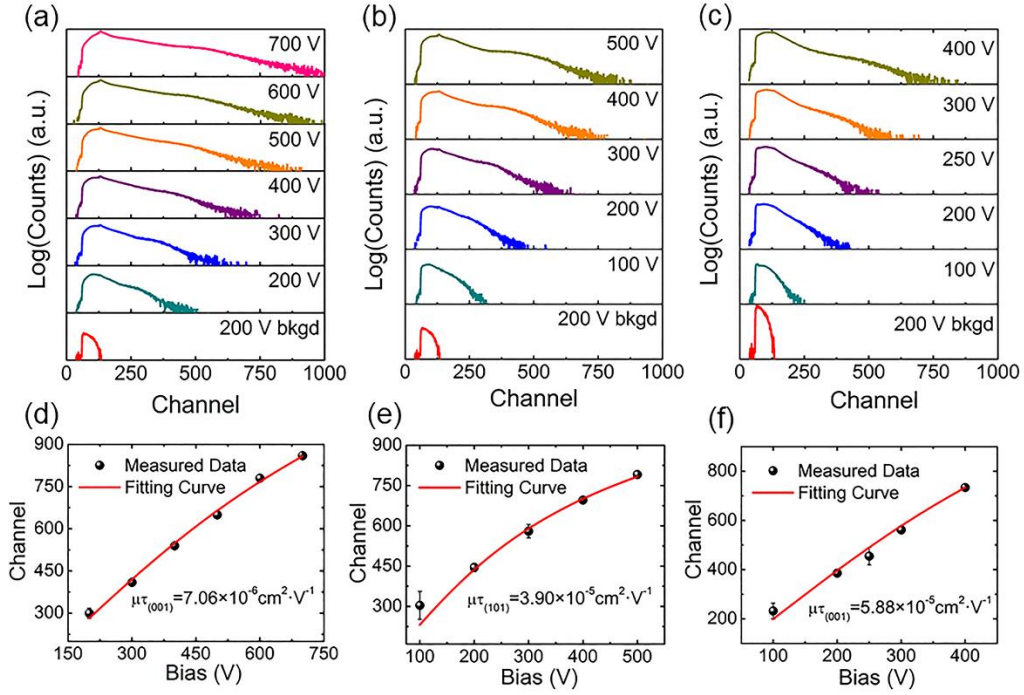

Fig. SI3 (a), (b) and (c) are the response spectra to  $^{241}\text{Am}$  alpha source of  $\text{CBI}_{(001)}$ ,  $\text{CBI}_{(101)}$  and  $\text{CBI}_{(100)}$ , respectively. (d), (e) and (f)  $\mu\tau$  of  $\text{CBI}_{(001)}$ ,  $\text{CBI}_{(101)}$  and  $\text{CBI}_{(100)}$  were  $7.06 \times 10^{-6} \text{ cm}^2 \cdot \text{V}^{-1}$ ,  $3.90 \times 10^{-5} \text{ cm}^2 \cdot \text{V}^{-1}$  and  $5.88 \times 10^{-5} \text{ cm}^2 \cdot \text{V}^{-1}$  fitted by the single carrier Hecht equation, respectively.

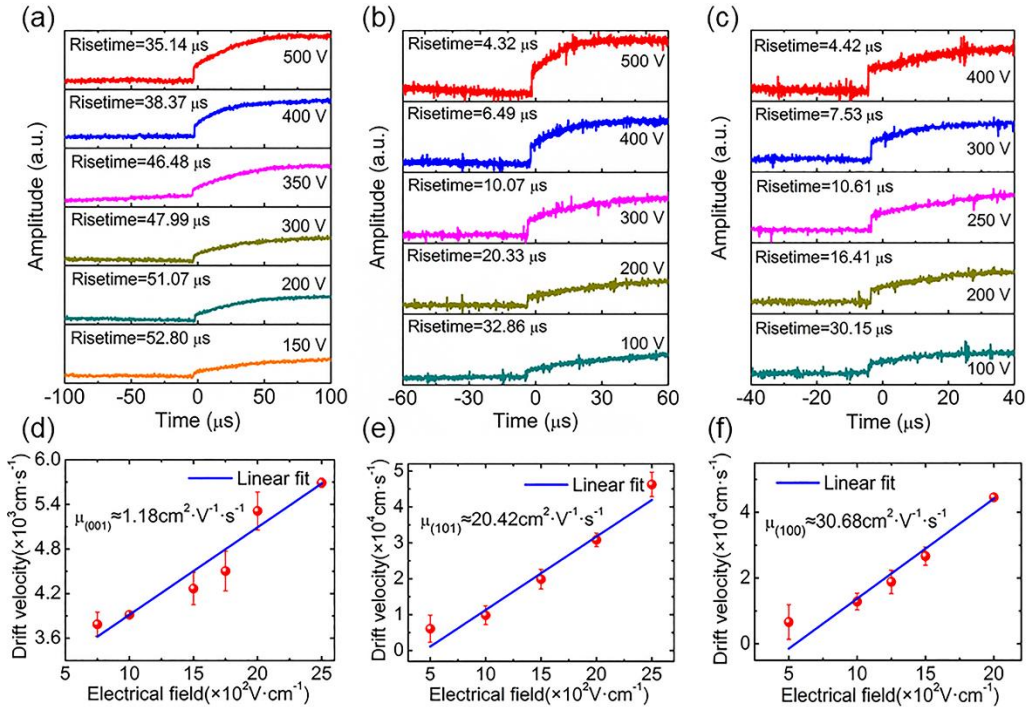

Fig. SI4 (a), (b) and (c) Alpha particles induced pulse shapes of  $\text{CBI}_{(001)}$ ,  $\text{CBI}_{(101)}$  and  $\text{CBI}_{(100)}$  under various bias, respectively. (d), (e) and (f) The electron mobilities of  $\text{CBI}_{(001)}$ ,  $\text{CBI}_{(101)}$  and  $\text{CBI}_{(100)}$  by the linear fitting, respectively.
